# Supplementary material
Source: Springer Nature journal article supplement (https://www.springermedizin.de/resource/supplementary/12908_2009_86_MOESM2_ESM.pdf/9525112)
Supplement: MOESM2 [file 9525112]

Lenalidomide in the treatment of refractory or relapsing multiple myeloma in patients for whom dexamethasone therapy is the only therapeutic option

Treatment / Category I / Trial setting A<sub>2</sub> / Score +6.0

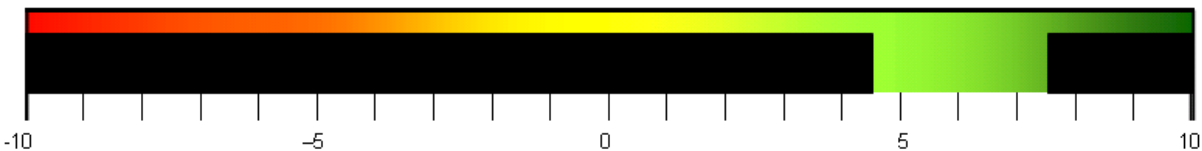

a.

Pioglitazone in the indication of DM2 (data up to 2001)

Prevention / Trial setting B<sub>2</sub> / Score +3.0

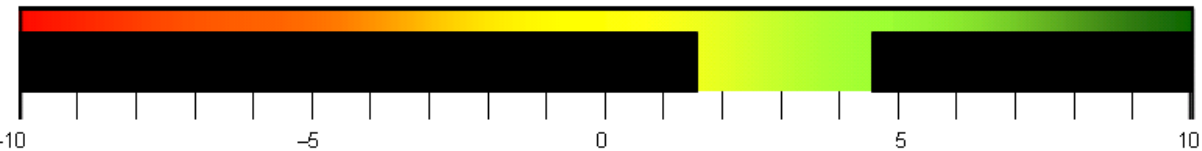

b.

Pioglitazone in the indication of DM2 (data up to 2005)

Prevention / Trial setting A<sub>2</sub> / Score -1.0

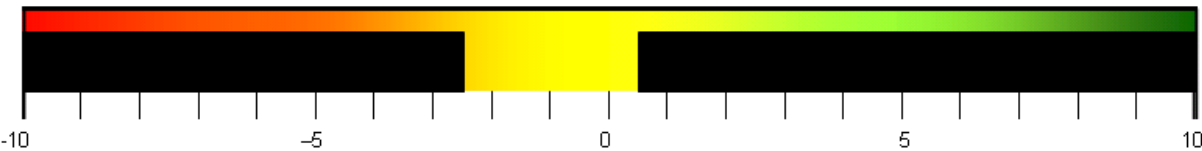

c.

Bupropion in the treatment of episodes of major depression

Treatment / Category I / Trial setting B1 / Score -1.25

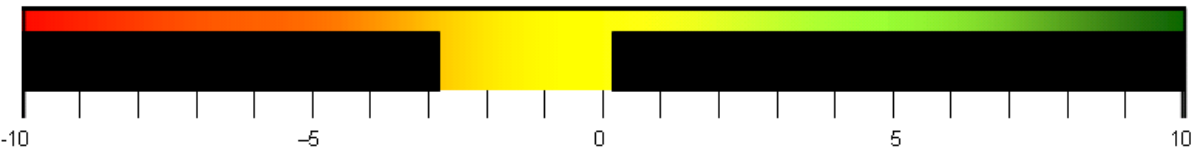

d.

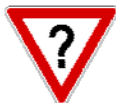

Zoledronic acid (5 mg annually) for the treatment of PMO

Treatment / Category I / Trial setting N/A

e.
